# Supplementary material for: Beyond the Beach: Multi-Parameter Interpretation of Shore Deterioration in a Caribbean Reef System
Source: MDPI journal article supplement (doi:10.3390/d16050266), 2024-04-30
Supplement: s1 [file s1]

# Supplementary Material

## 1.1 Supplementary Figures

1

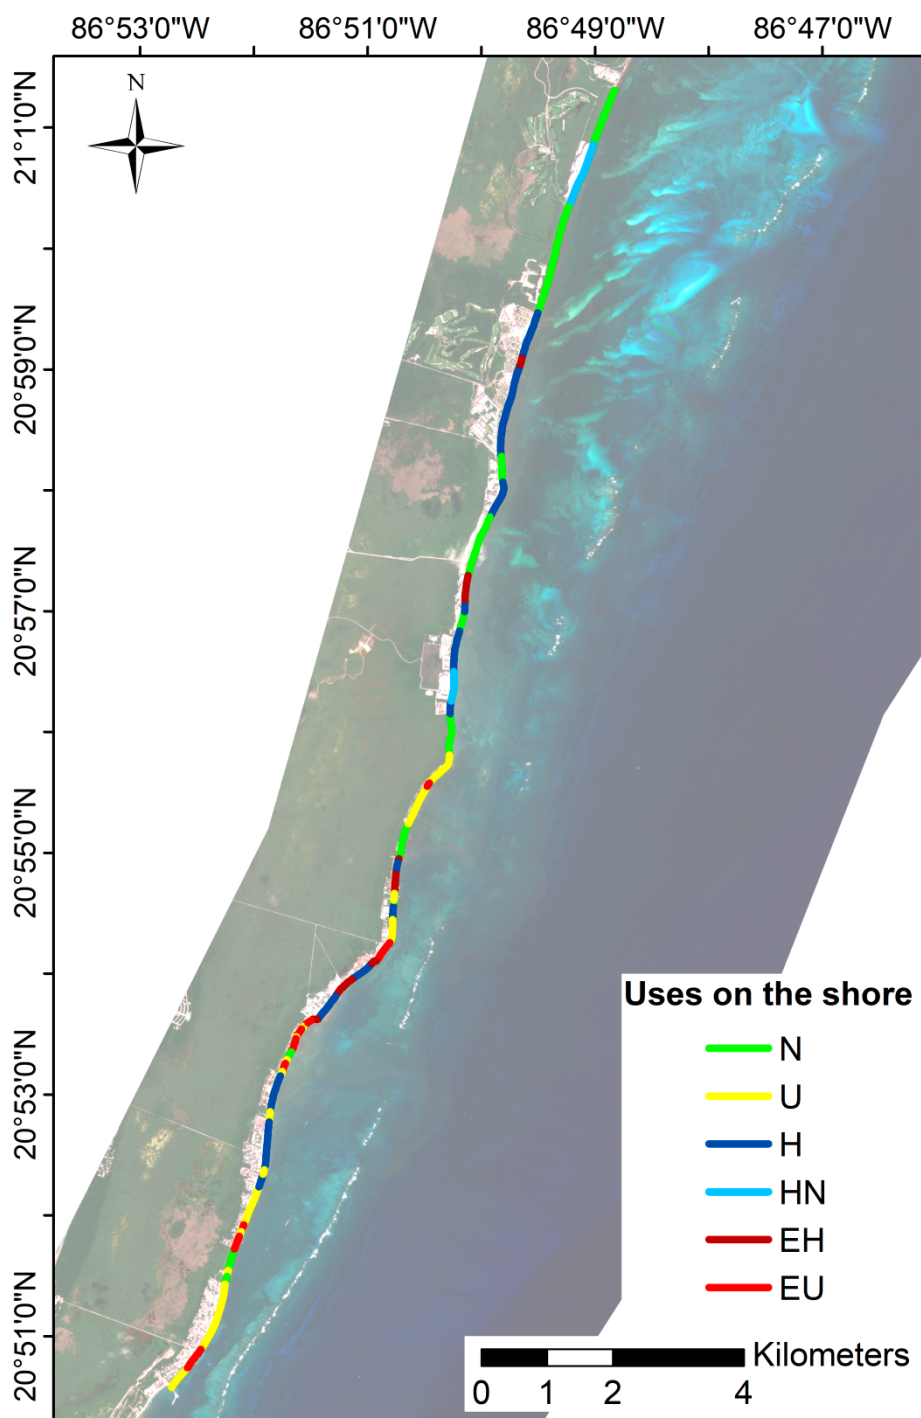

**Figure S1.** Land use on PNAPM shore (December 2022): N = Natural; U = Urban; H = Hotel; HN = Hotel New; EH = Erosion Hotel; EU = Erosion Urban.

2

3

4

5

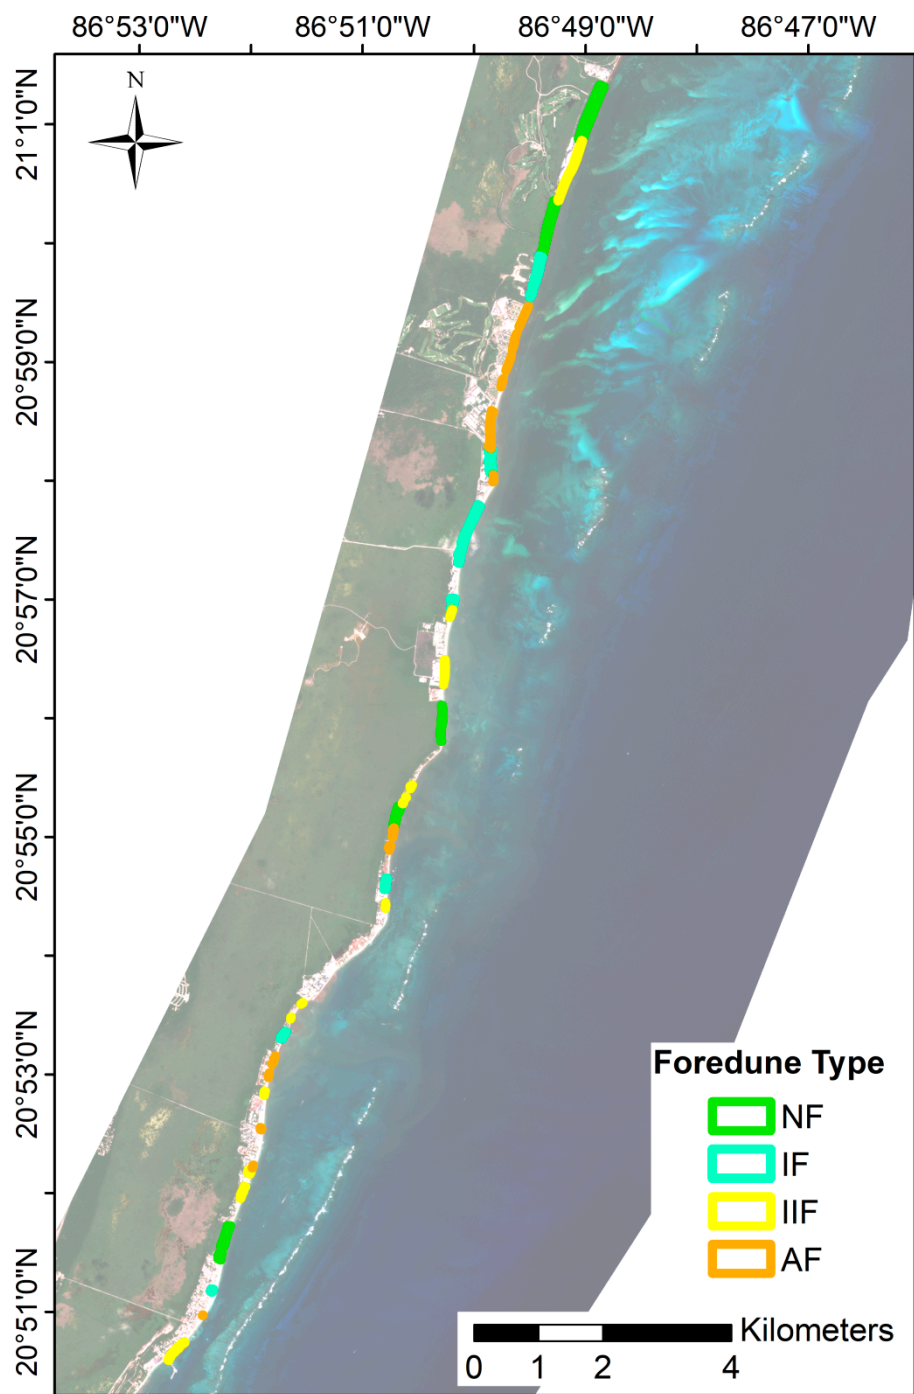

**Figure S2.** Locations of the foredune areas in PNAPM, January 2023: AF= artificial; NF=natural; IF= interrupted; IIF= interrupted and impacted.

6  
7  
8  
9  
10  
11  
12

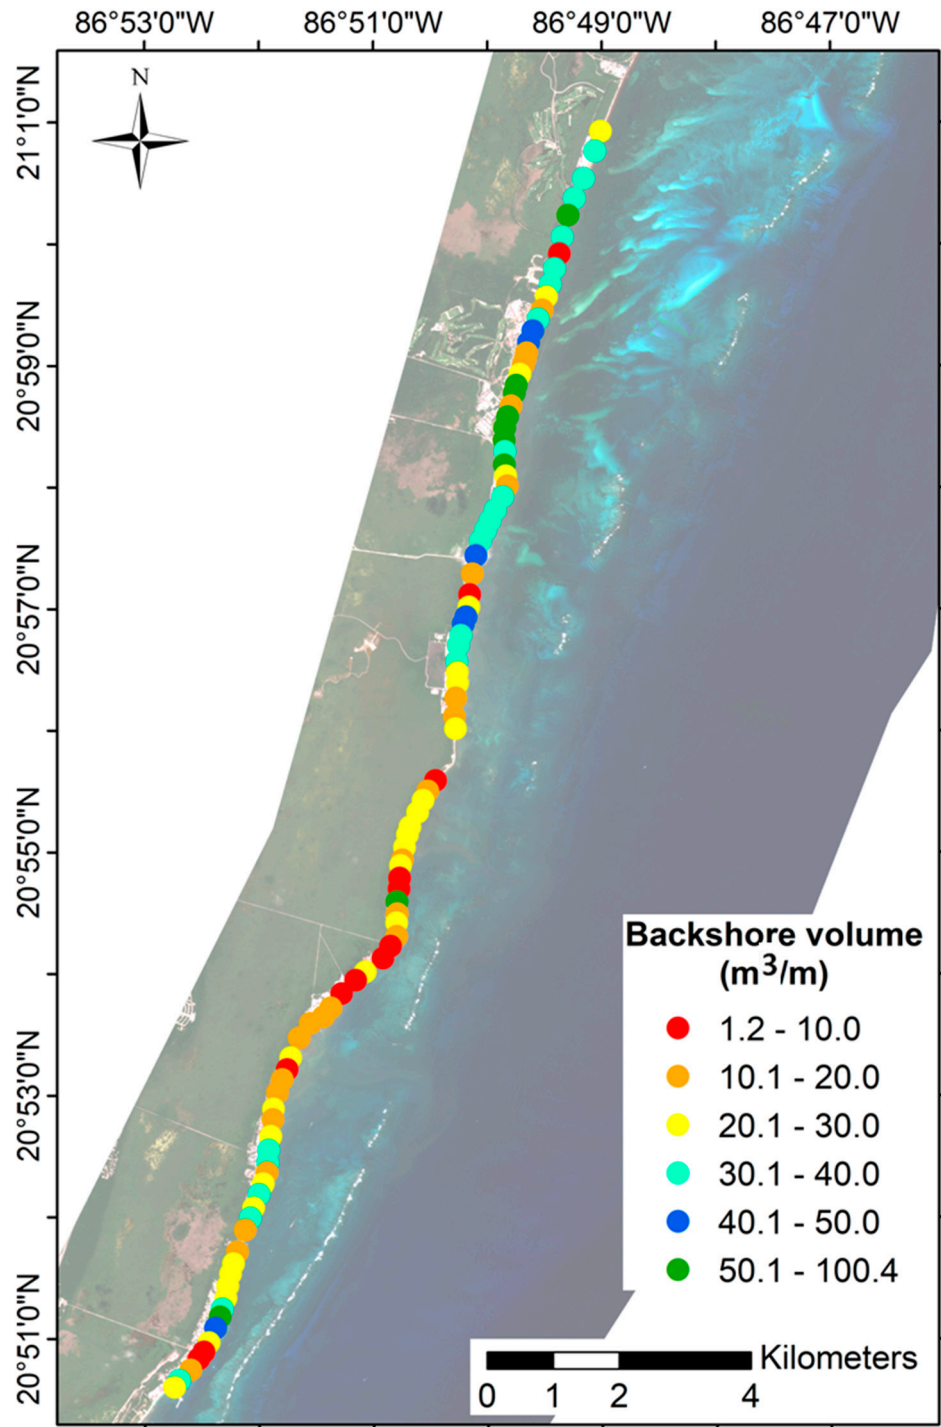

**Figure S3.** Spatial variation of backshore volume ( $\text{m}^3/\text{m}$ ) calculated from beach profile data in PNAPM, winter 2022/2023.

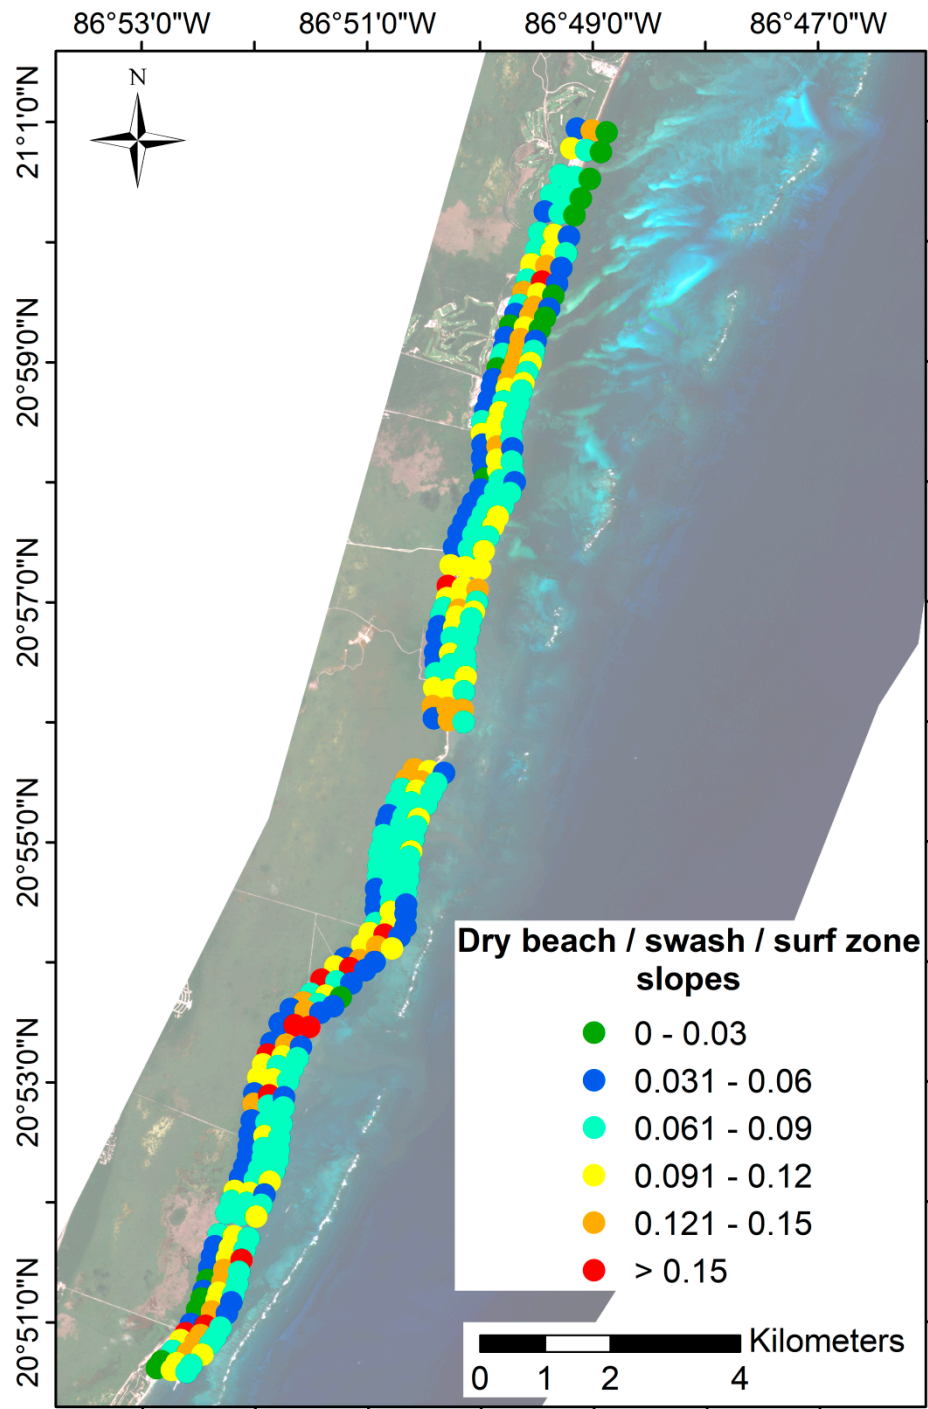

**Figure S4.** Spatial variation of slope of each beach profile zone obtained in PNAPM, winter 2022/2023: dry beach, swash zone and surf zone (Dry beach and surf zone data points are offset for better visualization).



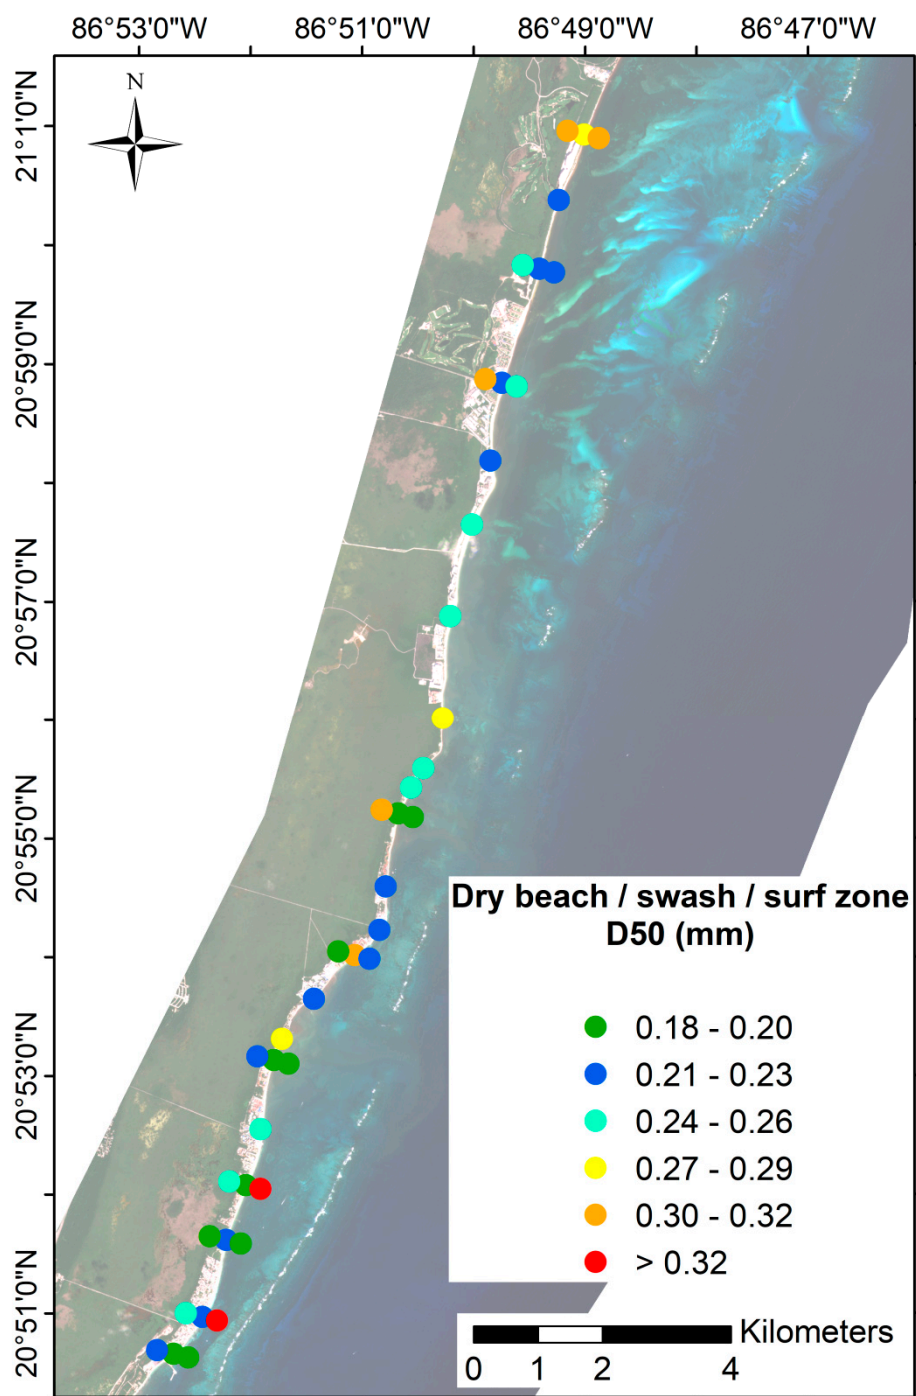

**Figure S5.** Grain size variation (D50) on PNAPM shore, winter 2022/2023, for dry beach, swash and surf zone. Locations with only 1 point refer to swash zone samples.

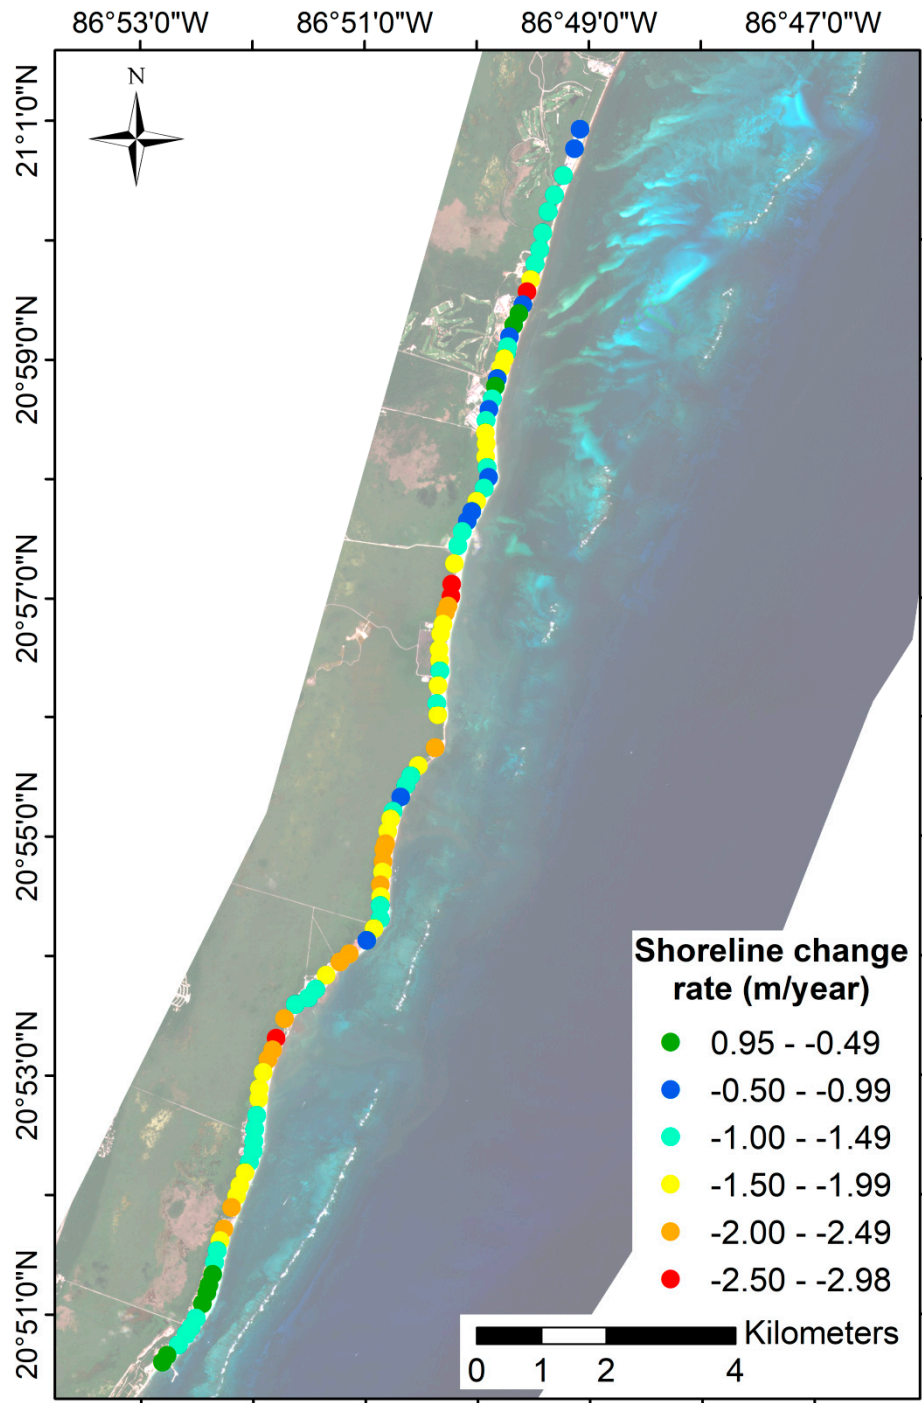

**Figure S6.** Shoreline change rate (m/year, between 2011-2022) for each location analyzed along the PNAPM shore.

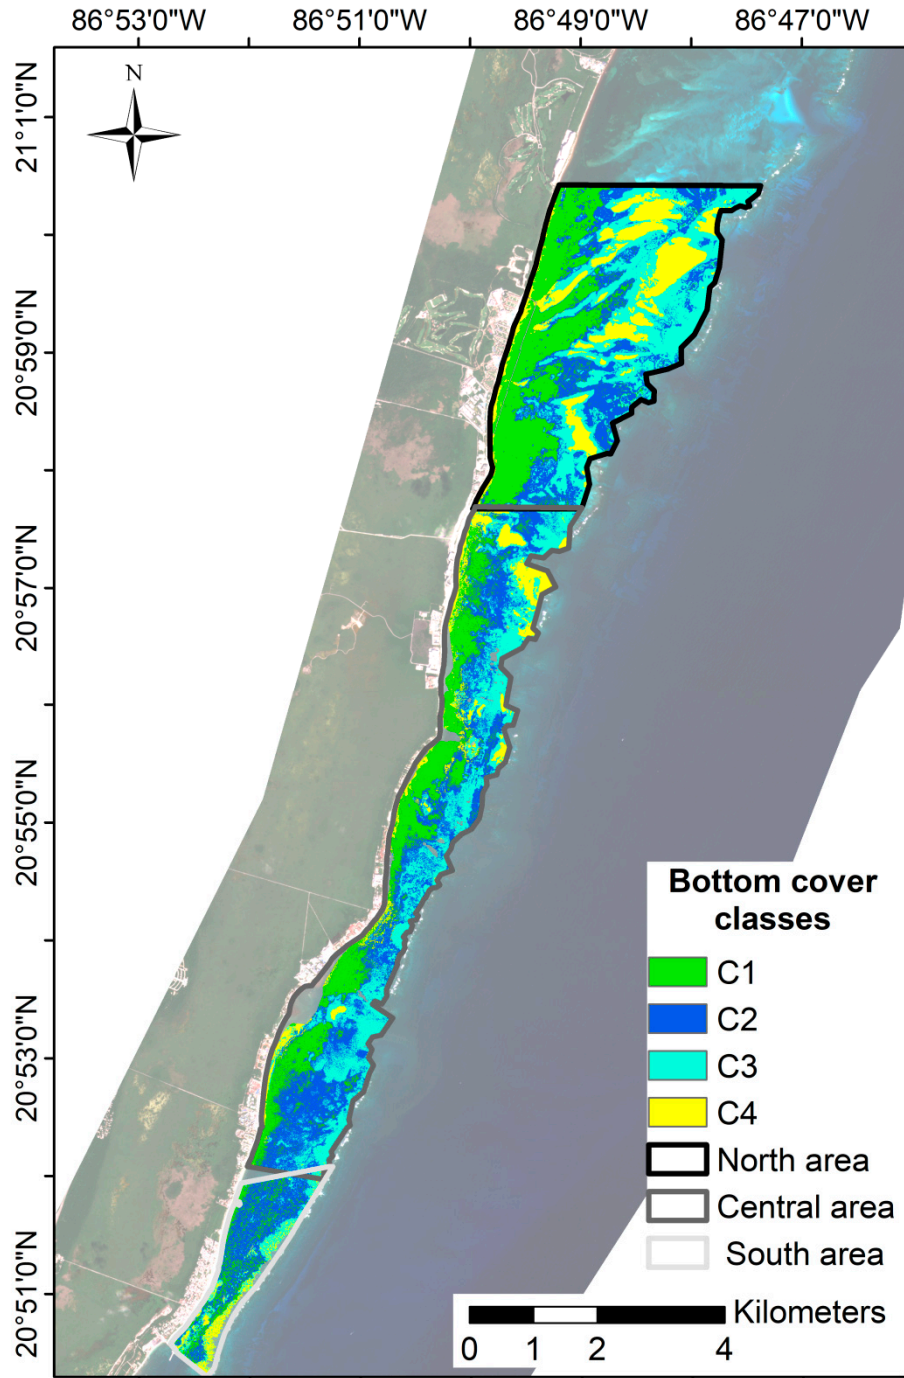

**Figure S7.** Map of bottom cover classes (vegetation/sediment) of the PNAPM reef lagoon, 2020/2021: C1 (dense vegetation), C2 (medium dense vegetation), C3 (Low dense vegetation), C4 (sediment). The bottom cover map of south area is an adaptation of [51].

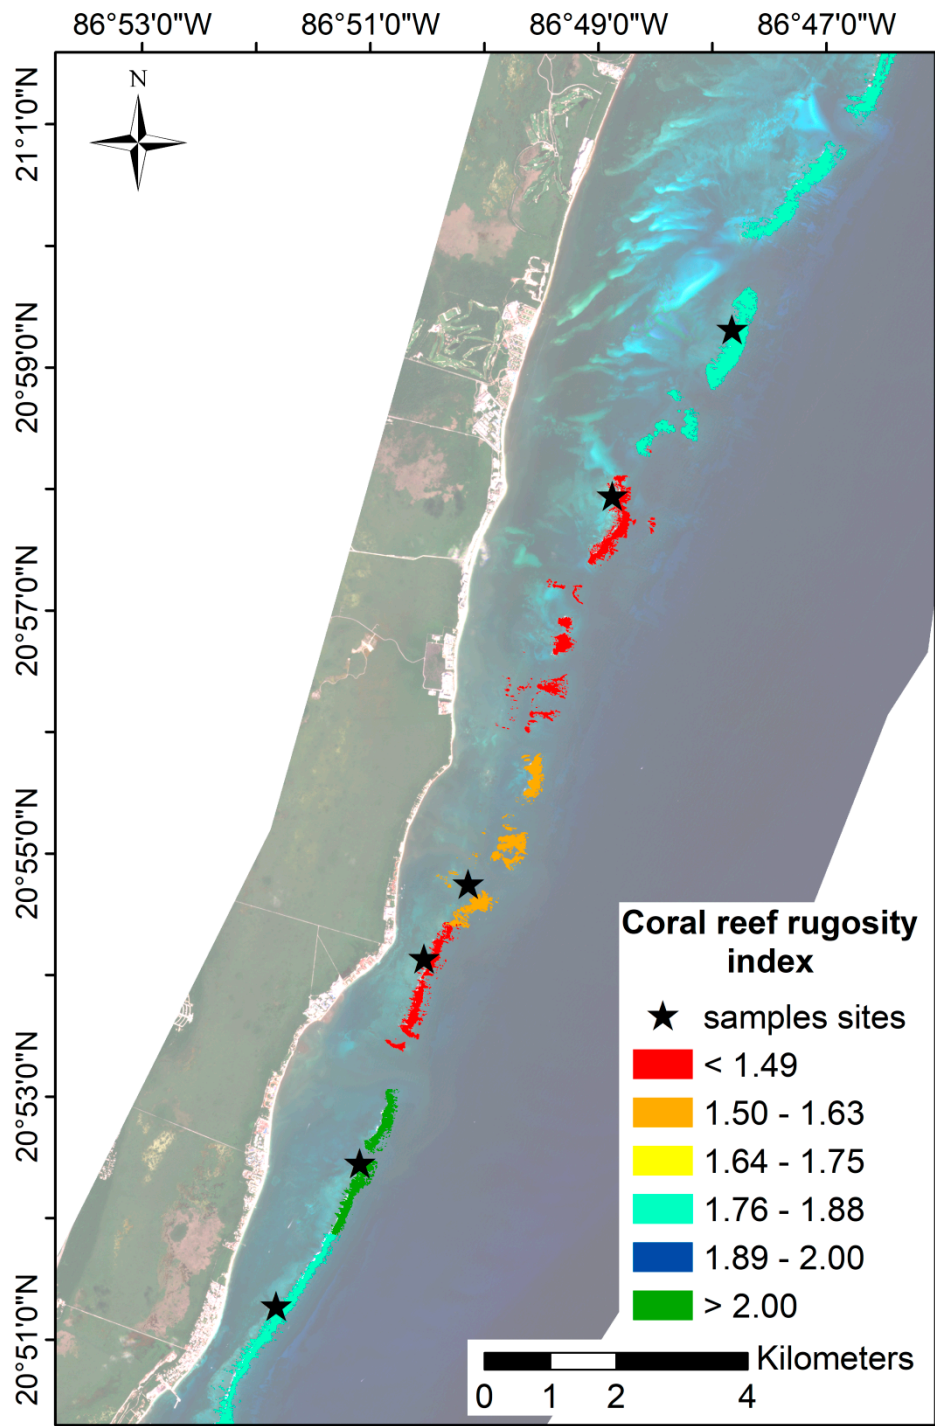

**Figure S8.** Map of coral reef rugosity index (sites data from [30] and backreef cover from [57]).

42  
43  
44  
45  
46
